# Supplementary material
Source: ML conference proceedings conference paper supplement (https://aclanthology.org/D19-1458)
Supplement: Attachment [file D19-1458.Attachment.zip]

Archive with 3 entries (2 files):
- CLUTRR_EMNLP_19_appendix.pdf
- __MACOSX/
- __MACOSX/._CLUTRR_EMNLP_19_appendix.pdf
